# Supplementary material
Source: Frontiers journal article supplement (https://www.frontiersin.org/articles/493742)
Supplement: Data_Sheet_5.PDF [file Data_Sheet_5.PDF]

## Supplementary Figure 5

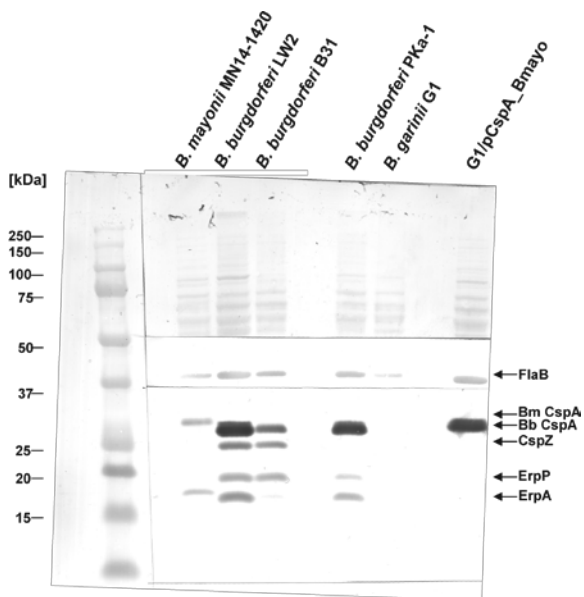

**Uncropped gel and Western blots of figure 3A.** Nitrocellulose membranes were scanned by a GS-710 Imaging Densitometer (Bio-Rad) and for image processing the Quantity One 4.2.1 software (Bio-Rad) was used. The general settings were as follows:

- Application: Blot; HRP-Substrate (DAB)
- Filter: Green
- Resolution: 42,3 \* 42,3 microns =High for small gels with tiny features

Transform operations: high: 4095; low: 379; gamma: 0.71

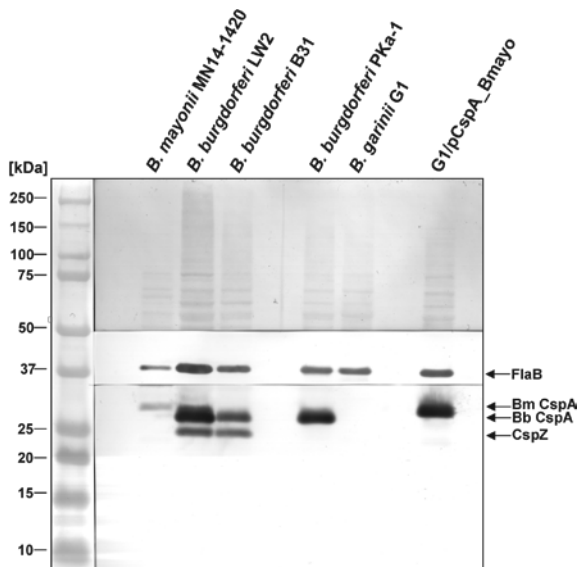

**Uncropped gel and Western blots of figure 3B.** Nitrocellulose membranes were scanned by a GS-710 Imaging Densitometer (Bio-Rad) and for image processing the Quantity One 4.2.1 software (Bio-Rad) was used. The general settings were as follows:

- Application: Blot; HRP-Substrate (DAB)
- Filter: Green
- Resolution: 42,3 \* 42,3 microns =High for small gels with tiny features

Transform operations: high: 4095; low: 0; gamma: 0.85

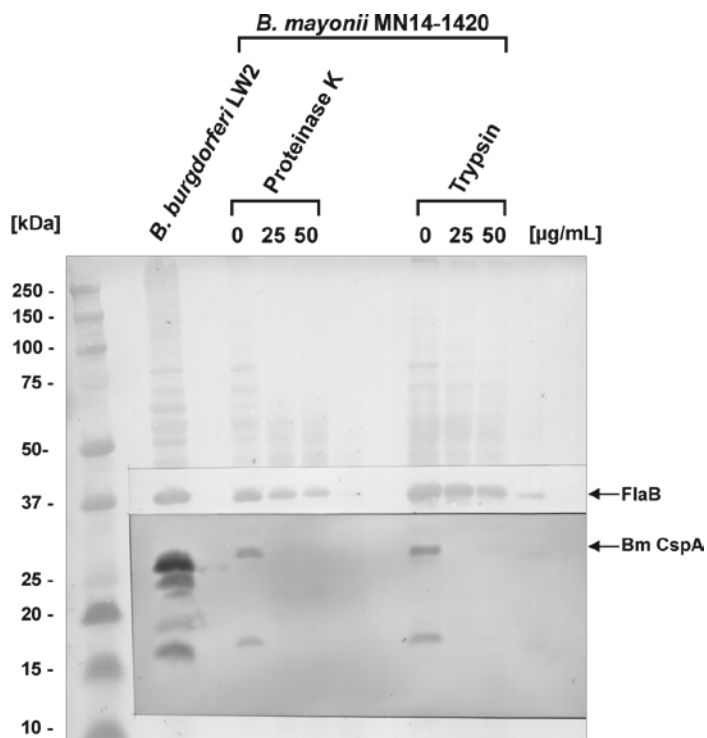

**Uncropped gel and Western blots of figure 3C.** Nitrocellulose membranes were scanned by a GS-710 Imaging Densitometer (Bio-Rad) and for image processing the Quantity One 4.2.1 software (Bio-Rad) was used. The general settings were as follows:

- Application: Blot; HRP-Substrate (DAB)
- Filter: Green
- Resolution: 42,3 \* 42,3 microns =High for small gels with tiny features

Transform operations: high: 4095; low: 0; gamma: 1.0

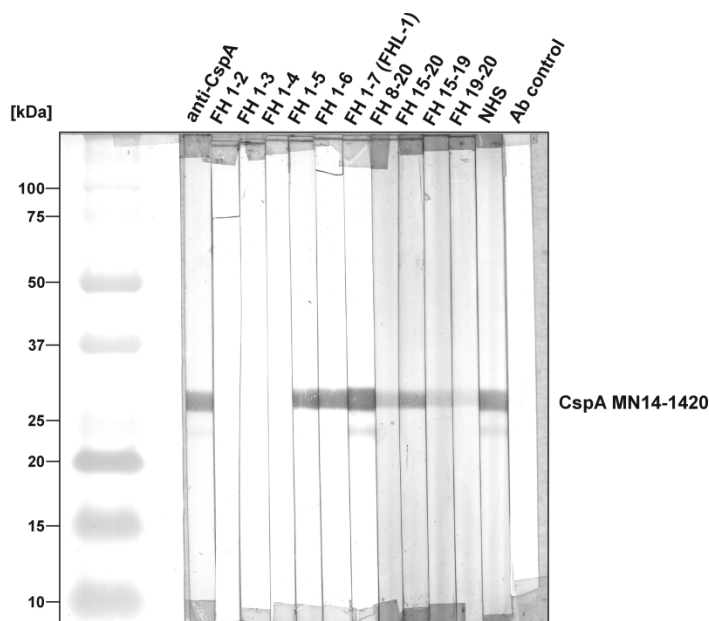

**Uncropped gel and Western blot of figure 4E.** Nitrocellulose membranes were scanned by a GS-710 Imaging Densitometer (Bio-Rad) and for image processing the Quantity One 4.2.1 software (Bio-Rad) was used. The general settings were as follows:

- Application: Blot; HRP-Substrate (DAB)
- Filter: Green
- Resolution: 42,3 \* 42,3 microns =High for small gels with tiny features

Transform operations: high: 4095; low; gamma: 1.00
